# Supplementary material for: Influence of interstitial UO22+ doping on the valence control of Eu and energy transfer to substitutional Eu3+ and Sm3+ in SrBPO5
Source: Royal Society of Chemistry journal article supplement (doi:10.1039/d1dt02657g), 2021-01-01
Supplement: d1dt02657g1.pdf [file d1dt02657g1.pdf]

## Supplementary Information

### Influence of interstitial $\text{UO}_2^{2+}$ doping on the valence control of Eu and energy transfer to substitutional $\text{Eu}^{3+}$ and $\text{Sm}^{3+}$ in $\text{SrBPO}_5$

P. Vinodkumar<sup>ab</sup>, R. K. Padhi<sup>b\*</sup>, Sitakanta Panda<sup>ab</sup>, P. Ramakrishna<sup>ac</sup> and B. S. Panigrahi<sup>ab</sup>

<sup>a</sup> Homi Bhabha National Institute, Kalpakkam, Tamil Nadu, India, 603102.

<sup>b</sup> Indira Gandhi Centre for Atomic Research, Kalpakkam, Tamil Nadu, 603102.

<sup>c</sup> Safety Research Institute, AERB, Kalpakkam, 603102

\* Corresponding author: email id: [ranjibkumarpadhi@gmail.com](mailto:ranjibkumarpadhi@gmail.com); [ranjib@igcar.gov.in](mailto:ranjib@igcar.gov.in)

#### Table S1.

**Table S1:**  $\text{Sm}^{2+}$  transitions and corresponding emission maxima in  $\text{SBP:Sm}_{0.005}$

| Transition                               | $^5\text{D}_0 \rightarrow ^7\text{F}_0$ | $^5\text{D}_0 \rightarrow ^7\text{F}_1$ | $^5\text{D}_0 \rightarrow ^7\text{F}_2$ | $^5\text{D}_0 \rightarrow ^7\text{F}_3$ | $^5\text{D}_0 \rightarrow ^7\text{F}_4$ |
|------------------------------------------|-----------------------------------------|-----------------------------------------|-----------------------------------------|-----------------------------------------|-----------------------------------------|
| Emission maxima, nm ( $\text{cm}^{-1}$ ) | 678 (14749)                             | 688 (14535)                             | 718 (13928)                             | 757 (13210)                             | 805 (12422)                             |
|                                          | 683 (14641)                             | 691 (14472)                             | 723 (13831)                             | 765 (13072)                             | 813 (12300)                             |
|                                          |                                         | 695 (14388)                             | 727 (13755)                             | 767 (13038)                             | 819 (12210)                             |
|                                          |                                         | 703 (14225)                             | 732 (13661)                             | 770 (12987)                             | 823 (12151)                             |
|                                          |                                         | 709 (14104)                             | 734 (13624)                             |                                         |                                         |
|                                          |                                         |                                         | 737 (13568)                             |                                         |                                         |
|                                          |                                         |                                         | 744 (13441)                             |                                         |                                         |
